# Supplementary material for: Edge- and bridge-engineering-mediated exciton dissociation and charge separation in carbon nitride to boost photocatalytic H2 evolution integrated with selective amine oxidation
Source: Royal Society of Chemistry journal article supplement (doi:10.1039/d2ta04003d), 2022-01-01
Supplement: d2ta04003d1.pdf [file d2ta04003d1.pdf]

## Electronic Supplementary Information

### **Edge and bridge engineering mediated exciton dissociation and charge separation in carbon nitride for boosting photocatalytic H<sub>2</sub> evolution integrated with selective amines oxidation**

Meiyang Song,<sup>#,a</sup> Xiaoxu Deng,<sup>#,b</sup> Gen Li,<sup>a</sup> Qiuchen Wang,<sup>a</sup> Haiyan Peng,<sup>a</sup> Peng Chen<sup>\*,a</sup> and Shuang-Feng Yin<sup>\*,c</sup>

<sup>a</sup> Provincial Guizhou Key Laboratory of Green Chemical and Clean Energy Technology, School of Chemistry and Chemical Engineering, Guizhou University, Guiyang 550025, Guizhou, China

<sup>b</sup> College of Big Data and Information Engineering, Guizhou University, Guiyang 550025, Guizhou, China

<sup>c</sup> State Key Laboratory of Chemo/Biosensing and Chemometrics, Provincial Hunan Key Laboratory for Cost-effective Utilization of Fossil Fuel Aimed at Reducing Carbon-dioxide Emissions, College of Chemistry and Chemical Engineering, Hunan University, Changsha 410082, Hunan, China

<sup>#</sup> These authors contribute equally to this work

Email: pchen3@gzu.edu.cn (P. Chen), sf\_yin@hnu.edu.cn (S. F. Yin).

**Table S1. Binding energy and area ratio of C 1s over as prepared samples**

| Samples                       | C-NH  |       | C=C/C-C |       | N=C-N |       | C=O   |       |
|-------------------------------|-------|-------|---------|-------|-------|-------|-------|-------|
|                               | BE    | Area  | BE      | Area  | BE    | Area  | BE    | Area  |
|                               | eV    | ratio | eV      | ratio | eV    | ratio | eV    | ratio |
|                               |       | %     |         | %     |       | %     |       | %     |
| C <sub>3</sub> N <sub>4</sub> | 286.2 | 2.0   | 284.6   | 5.9   | 288.0 | 92.1  |       |       |
| EBCN-1                        | 286.1 | 5.7   | 284.6   | 11.1  | 288.0 | 60.4  | 288.5 | 22.8  |
| EBCN-2                        | 286.8 | 5.7   | 284.6   | 7.4   | 288.0 | 72.5  | 288.4 | 14.4  |
| EBCN-3                        | 286.2 | 3.5   | 284.6   | 7.6   | 287.9 | 76.6  | 288.5 | 12.3  |
| ECN                           | 286.2 | 5.1   | 284.6   | 10.7  | 288.0 | 67.4  | 288.5 | 16.8  |
| BCN                           | 286.2 | 6.2   | 284.6   | 52.2  | 287.9 | 41.6  |       |       |

**Table S2. Binding energy and area ratio of N 1s over as prepared samples**

| Samples                       | C-N=C |       | N-(C) <sub>3</sub> |       | N-H <sub>x</sub> |       |
|-------------------------------|-------|-------|--------------------|-------|------------------|-------|
|                               | BE    | Area  | BE                 | Area  | BE               | Area  |
|                               | eV    | ratio | eV                 | ratio | eV               | ratio |
|                               |       |       |                    |       |                  |       |
| C <sub>3</sub> N <sub>4</sub> | 398.5 | 74.7  | 399.9              | 17.0  | 401.1            | 8.3   |
| EBCN-1                        | 398.5 | 66.0  | 399.7              | 21.3  | 401.0            | 12.7  |
| EBCN-2                        | 398.6 | 72.9  | 399.9              | 19.3  | 401.1            | 7.8   |
| EBCN-3                        | 398.3 | 64.6  | 399.5              | 29.3  | 400.7            | 6.1   |
| ECN                           | 398.2 | 75.3  | 399.9              | 13.3  | 400.9            | 11.4  |
| BCN                           | 397.9 | 86.2  | 399.7              | 6.5   | 400.5            | 7.3   |

**Table S3. Binding energy and area ratio of O 1s over as prepared samples**

| Samples | Adsorbed oxygen |       | C=O   |       | Adsorbed H <sub>2</sub> O |       |
|---------|-----------------|-------|-------|-------|---------------------------|-------|
|         | BE              | Area  | BE    | Area  | BE                        | Area  |
|         | eV              | ratio | eV    | ratio | eV                        | ratio |
| EBCN-1  | 530.7           | 25.3  | 531.6 | 35.2  | 532.7                     | 39.5  |
| EBCN-2  | 530.6           | 26.1  | 531.6 | 34.7  | 532.7                     | 39.2  |
| EBCN-3  | 530.9           | 26.4  | 531.7 | 24.4  | 532.5                     | 49.2  |
| ECN     | 530.7           | 36.8  | 531.7 | 41.3  | 532.7                     | 21.9  |

**Table S4. Zeta potentials of the as-prepared photocatalysts.**

| Test time | EBCN-1 (mV) | EBCN-2 (mV) | EBCN-3 (mV) | C <sub>3</sub> N <sub>4</sub> (mV) | ECN (mV) | BCN (mV) |
|-----------|-------------|-------------|-------------|------------------------------------|----------|----------|
| 1         | -49.1       | -60.3       | -52.9       | -43.2                              | -44.9    | -42.5    |
| 2         | -48.5       | -62.5       | -55.4       | -45.6                              | -45.4    | -43.6    |
| 3         | -49.8       | -59.5       | -51.8       | -46.3                              | -49.5    | -40.9    |
| 4         | -48.2       | -60.5       | -53.8       | -44.5                              | -46.2    | -39.1    |
| 5         | -47.9       | -63.8       | -53.4       | -47.3                              | -44.3    | -40.2    |
| 6         | -50.6       | -59.4       | -53.1       | -47.2                              | -44.7    | -40.8    |
| Average   | -49.0       | -61.0       | -53.4       | -45.7                              | -45.8    | -41.2.   |

**Table S5. Comparison of the EBCN-2 photocatalysts with the previously reported ones for hydrogen production coupled with selective oxidation of benzylamine.**

| Entry | Catalyst                                             | Reaction Conditions                                                                                            | H <sub>2</sub> production (μmol·g <sup>-1</sup> ·h <sup>-1</sup> ) | Ref. No.  |
|-------|------------------------------------------------------|----------------------------------------------------------------------------------------------------------------|--------------------------------------------------------------------|-----------|
| 1     | EBCN-2                                               | 20 mg catalyst<br>10 mL BA<br>50 mL H <sub>2</sub> O<br>1 mL H <sub>2</sub> PtCl <sub>6</sub><br>300 W Xe lamp | 2296.3                                                             | This work |
| 2     | Pt/PCN-777                                           | 10 mg catalyst<br>50 μL BA<br>50 μL H <sub>2</sub> O<br>5mL DMF<br>300 W Xe lamp                               | 332                                                                | [S1]      |
| 3     | Pt/MOF-808                                           | 10 mg catalyst<br>50 μL BA<br>50 μL H <sub>2</sub> O<br>5mL DMF<br>200mg AgNO <sub>3</sub><br>300 W Xe lamp    | 1.7                                                                | [S1]      |
| 4     | PdS <sub>A+C</sub> /TiO <sub>2</sub> -V <sub>o</sub> | 10 mg catalyst<br>500 μLH <sub>2</sub> O<br>500 μL BA<br>50 mL DMF<br>300 W Xe lamp                            | 585.4                                                              | [S2]      |
| 5     | CdS/Ti <sub>3</sub> C <sub>2</sub> T <sub>x</sub>    | 10 mg catalyst<br>2.5 mmol H <sub>2</sub> O<br>0.5 mmol BA<br>5 mL DMF<br>300 W Xe lamp                        | 219.7                                                              | [S3]      |

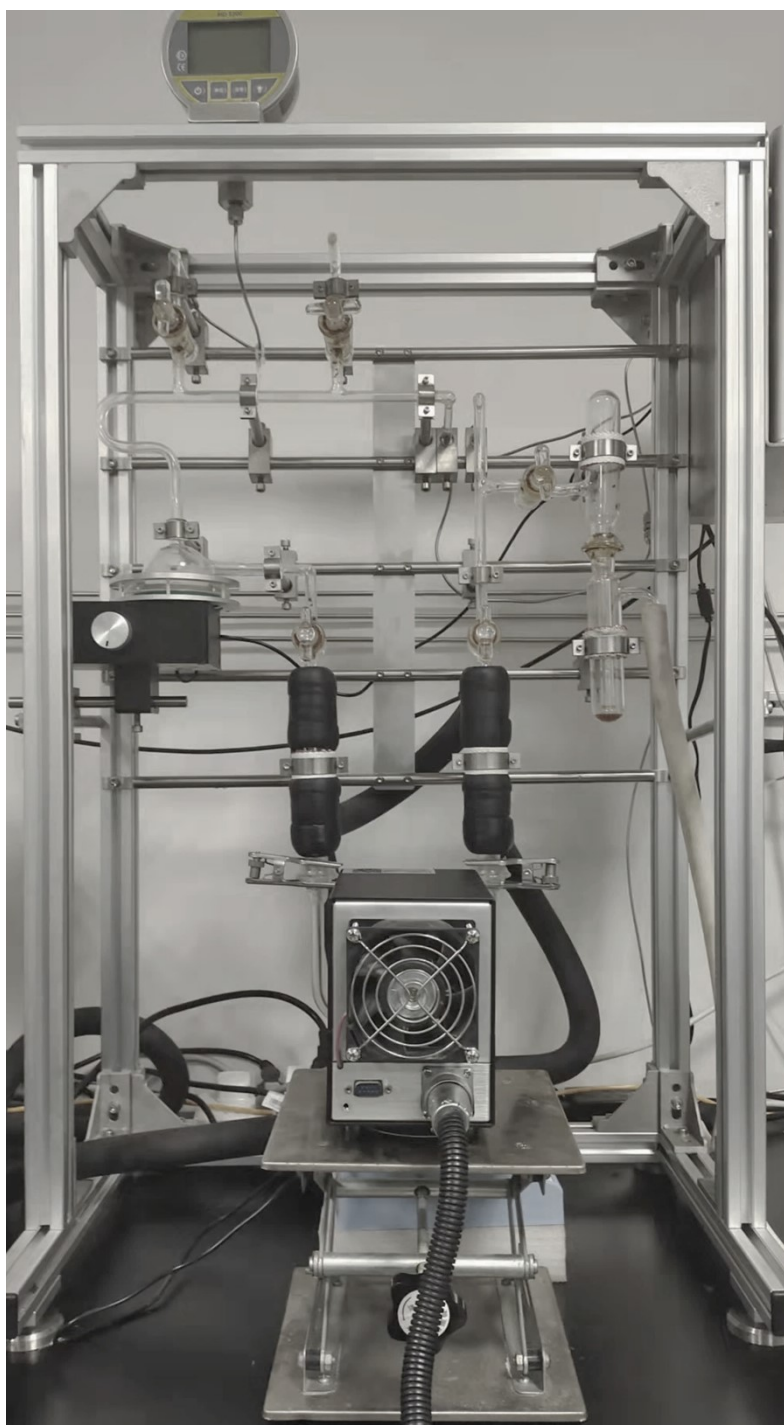

**Fig. S1.** Photograph of the multi-channel photocatalytic reaction system.

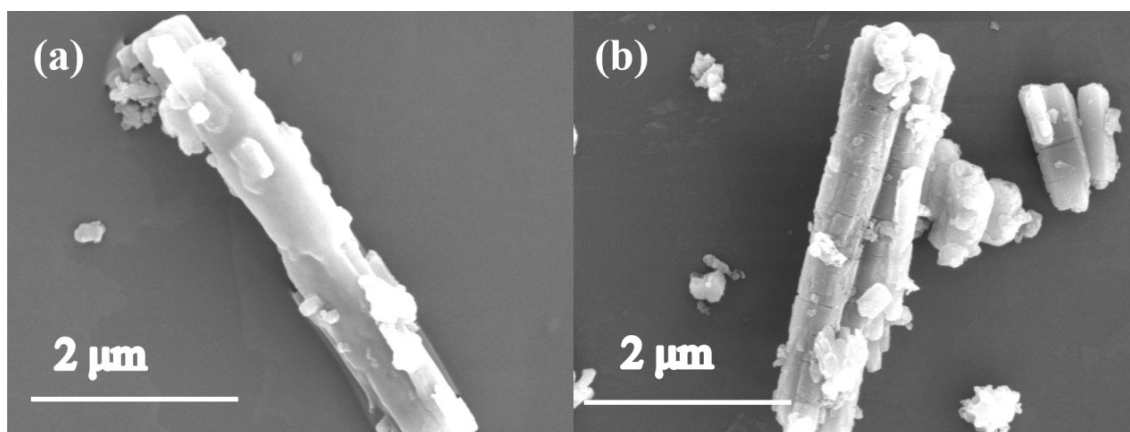

**Fig. S2.** SEM images of (a) melem and (b) precursor.

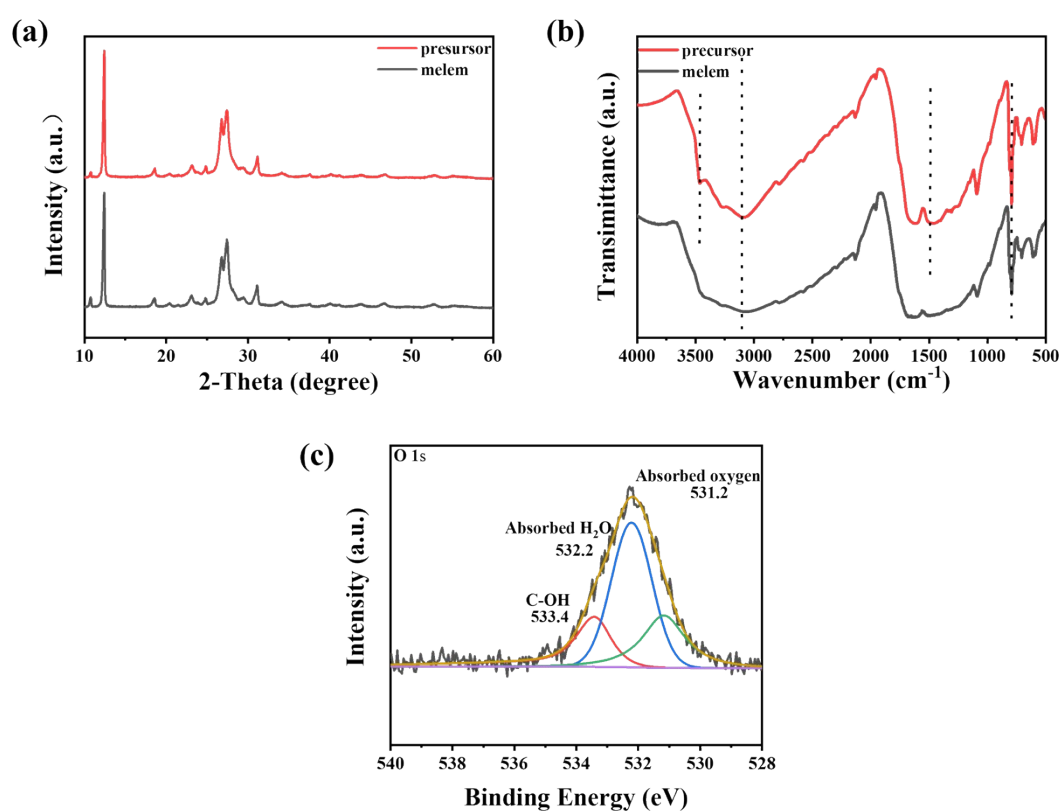

**Fig. S3.** (a) XRD patterns and (b) FTIR spectra of melem and precursor. (c) O 1s high-resolution spectra of precursor.

The XRD pattern of the as-synthesized precursor, depicted in **Fig. S3a**, is similar to the melem, which indicates that the formation of the precursor did not disrupt the structure of the melem.<sup>S4</sup> As shown in **Fig. S3b**, the peaks at 793.5 and 3103 cm<sup>-1</sup>, corresponding to the vibration of triazine rings and the N-H group. Compared with the

result for melem, the FTIR spectrum of the precursor shows a new peak at  $3465\text{ cm}^{-1}$  is the superposition absorption peak of a hydroxyl group, and the peak at  $1495\text{ cm}^{-1}$  belongs to  $\text{C-H}_2$ , indicating that the  $\text{N-H}$ ,  $\text{C-H}_2$  and  $\text{O-H}$  groups exist in the precursor.<sup>S5,6</sup> **Fig. 3c** shows the O 1s spectra of the precursor at 531.2, 532.2 and 533.4 eV, which is related to the absorbed oxygen, absorbed  $\text{H}_2\text{O}$  and  $\text{C-OH}$  bonds, further confirmed that the structure of the precursor.<sup>S7</sup>

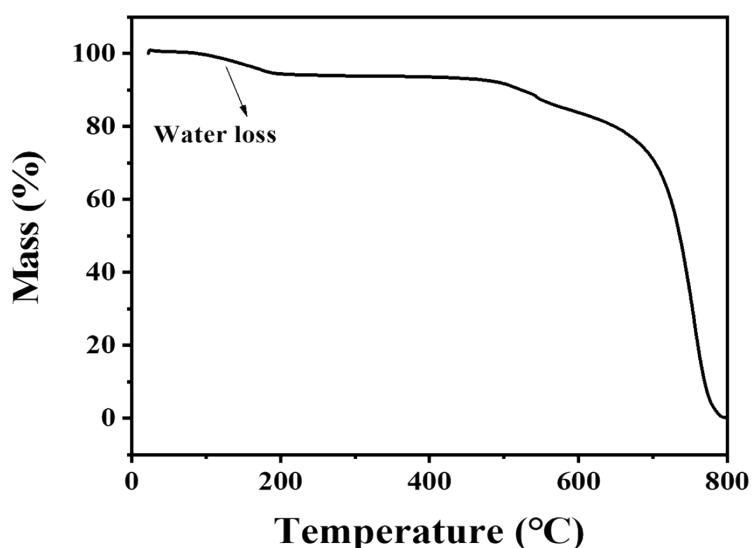

**Fig. S4.** TG spectrum of precursor.

The thermal behavior of the precursor was investigated using TGA technology, and the results are shown in **Fig. S4**. The TGA thermogram of the precursor shows two states of weightlessness in the range of 100-200°C and 450-740°C. The first small weight loss (~6%) in the range of 100-150°C was due to the loss of surface adsorbed water molecules. The second major weight loss started at 450°C, which is due to the gradual polymerization of the precursor.<sup>S8</sup>

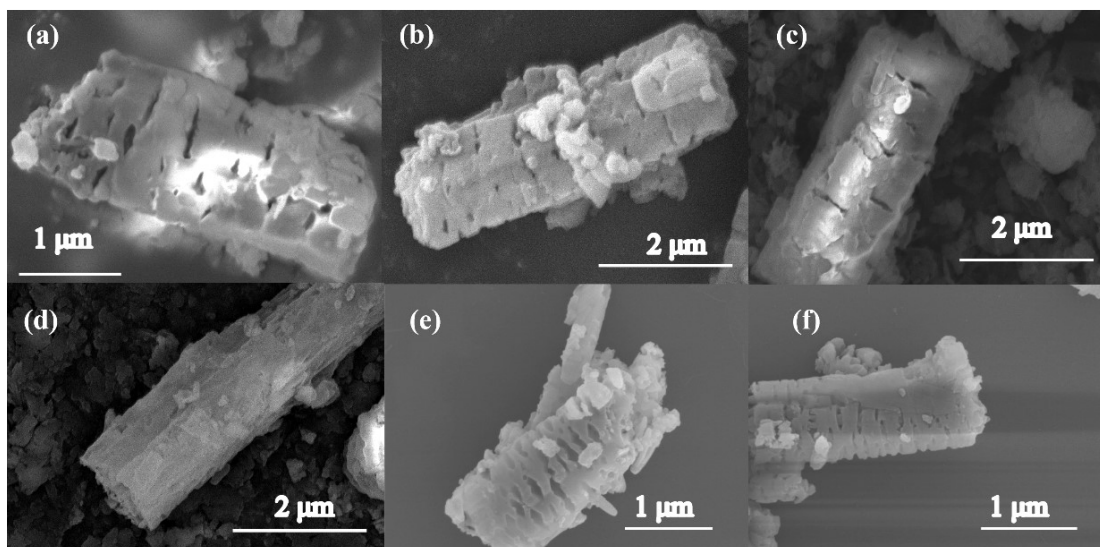

**Fig. S5.** SEM images of (a) EBCN-1, (b) EBCN-2, (c) EBCN-3, (d)  $C_3N_4$ , (e) ECN and (f) BCN.

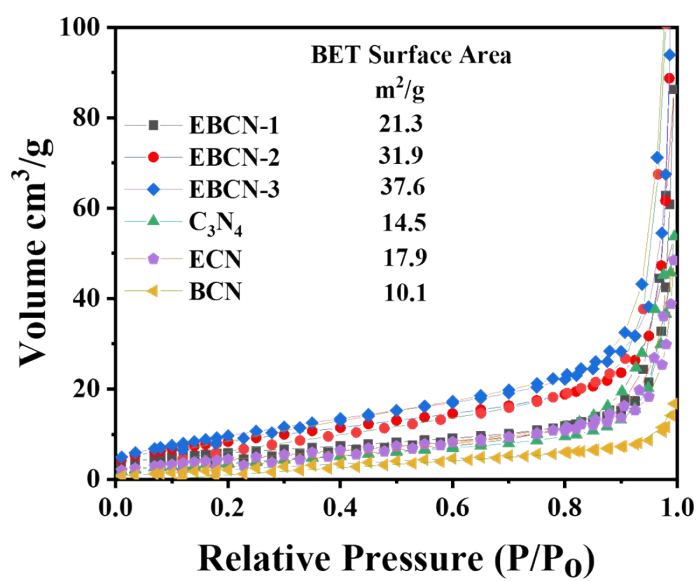

**Fig. S6.**  $N_2$  sorption isotherms of as-fabricated with the BET surface area data provided as inset.

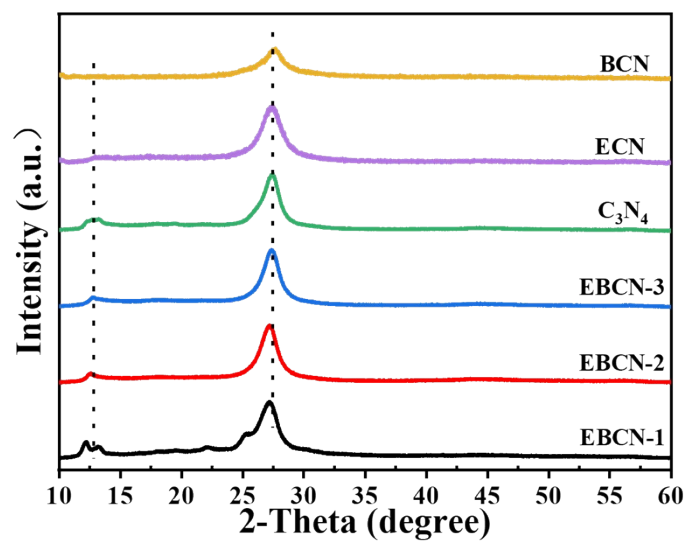

**Fig. S7.** XRD patterns of as-fabricated samples.

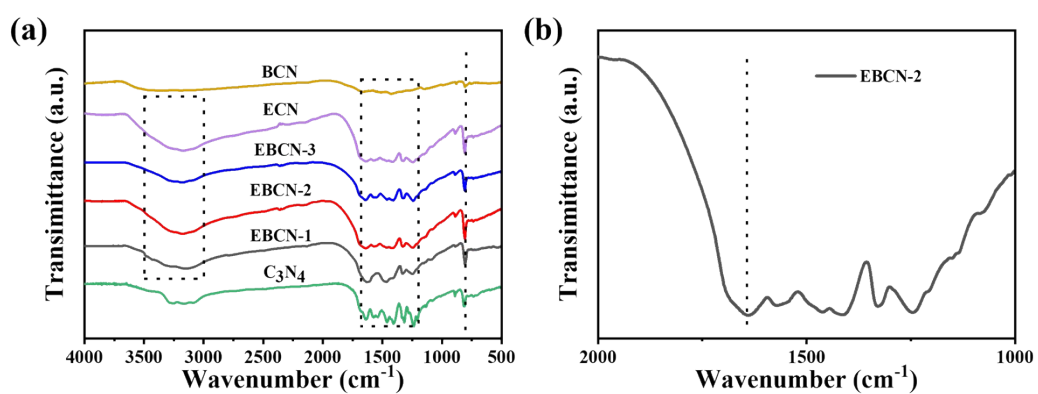

**Fig. S8.** (a) FTIR patterns of as-fabricated samples, (b) Enlarged FTIR spectrum of EBCN-2.

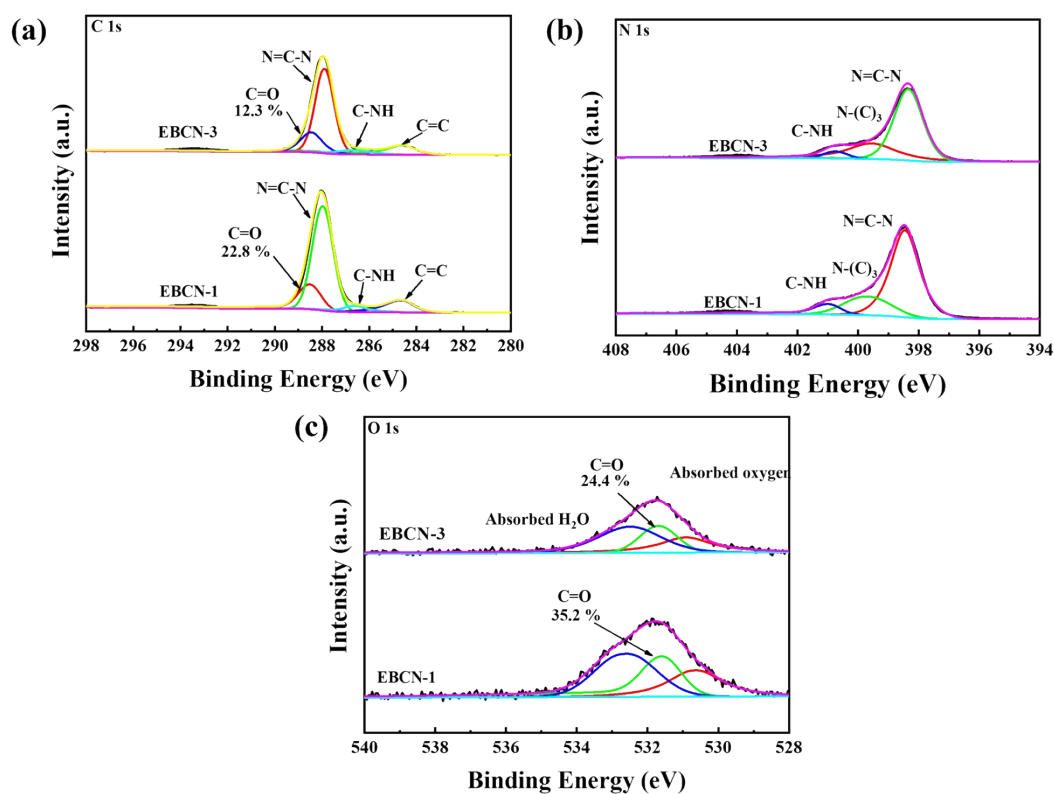

**Fig. S9.** High-resolution XPS spectra of EBCN-1 and EBCN-3: (a) C 1s, (b) N 1s and (c) O 1s.

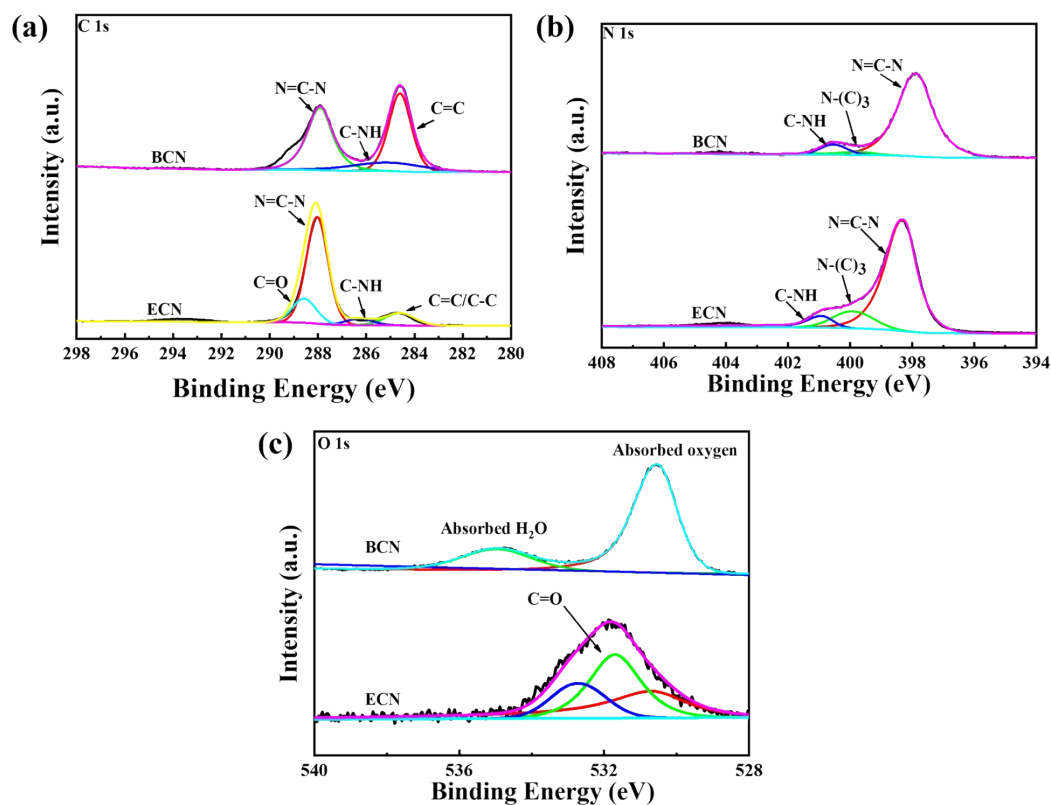

**Fig. S10.** High-resolution XPS spectra of BCN and ECN catalysts: (c) C 1s, (d) N 1s, (e) O 1s.

As shown in **Fig. S10a**, ECN's C 1s spectra at 288.5, 284.6, 286.2, and 288.0 eV corresponds to O-C=O, C=C, C-NH, and N=C-N bonds,<sup>S9</sup> suggesting that carboxylic groups and C=C linker are effectively grafted on the surface of ECN. The N 1s peaks of ECN at 398.2, 399.9, and 400.9 eV were related to the C-N=C, N-(C)<sub>3</sub>, and C-NH bonds, respectively (**Fig. S10b**).<sup>S10</sup> The O 1s spectrum also reveals three peaks at 530.7, 531.7 and 532.7 eV, which are attributed to absorbed oxygen, O-C=O and absorbed H<sub>2</sub>O.<sup>S11</sup> The peaks detected at 284.6, 286.2 and 287.9 eV corresponding to C=C, C-NH, and N=C-N bonds.<sup>S9</sup> The N 1s peaks of BCN at 397.9, 399.7, and 400.5 eV were related to the C-N=C, N-(C)<sub>3</sub>, and C-NH bonds,<sup>S10</sup> respectively. Above all, the results indicated that the ECN and BCN had been effectively prepared.

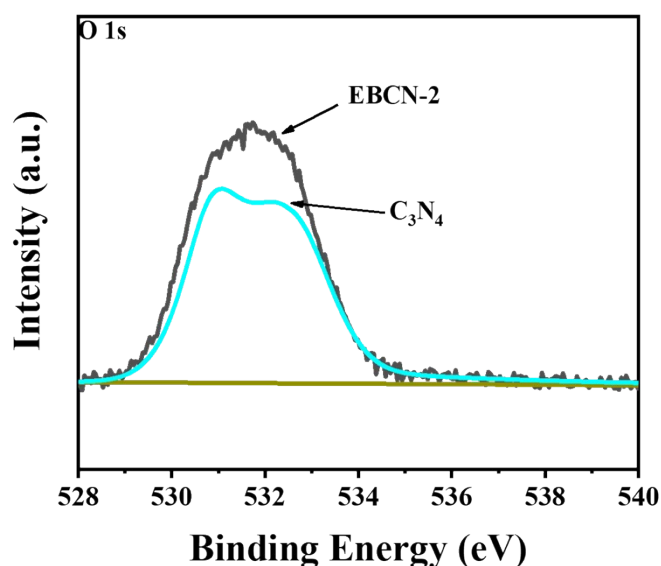

**Fig. S11.** O 1s high-resolution spectra of EBCN-2 and C<sub>3</sub>N<sub>4</sub>.

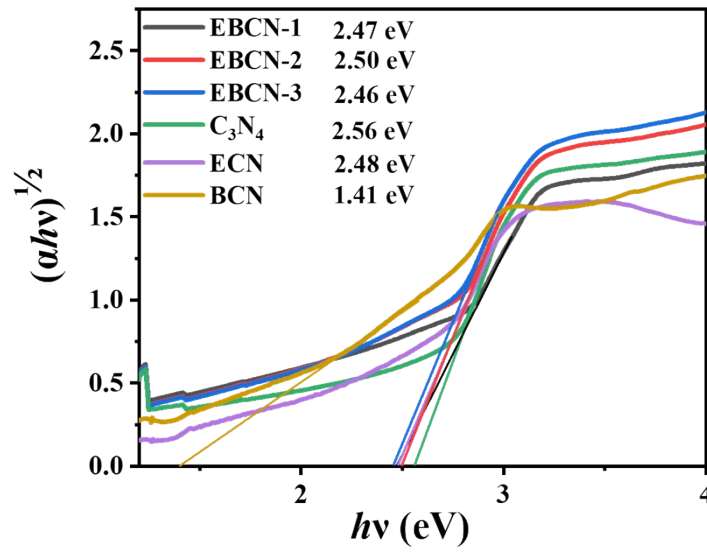

**Fig. S12.** The corresponding Tauc plots of fabricated samples.

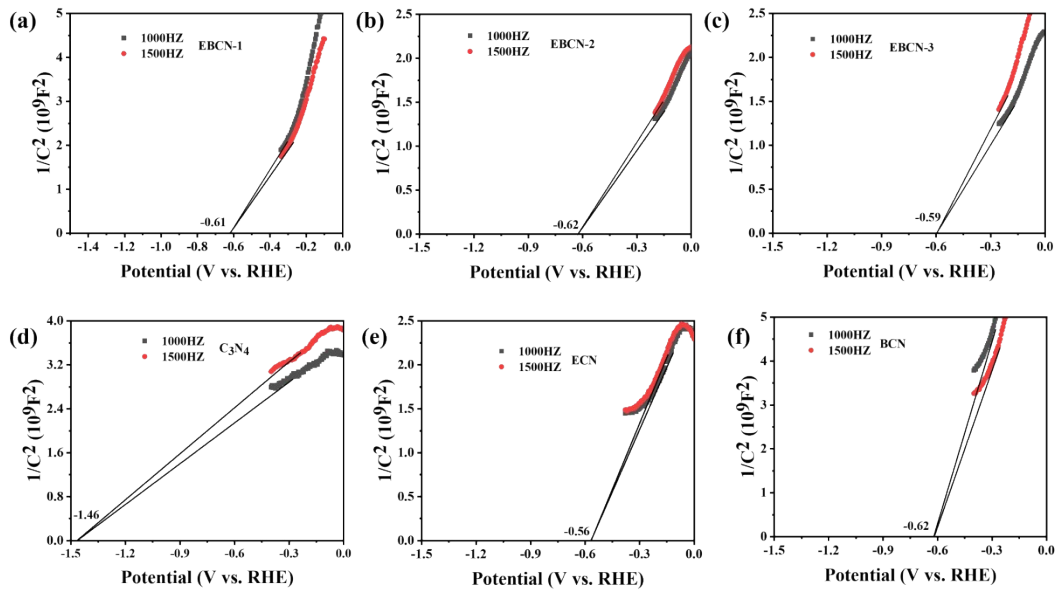

**Fig. S13.** Mott-Schottky plots of fabricated samples: (a) EBCN-1, (b) EBCN-2, (c) EBCN-3, (d) C<sub>3</sub>N<sub>4</sub>, (e) ECN and (f) BCN.

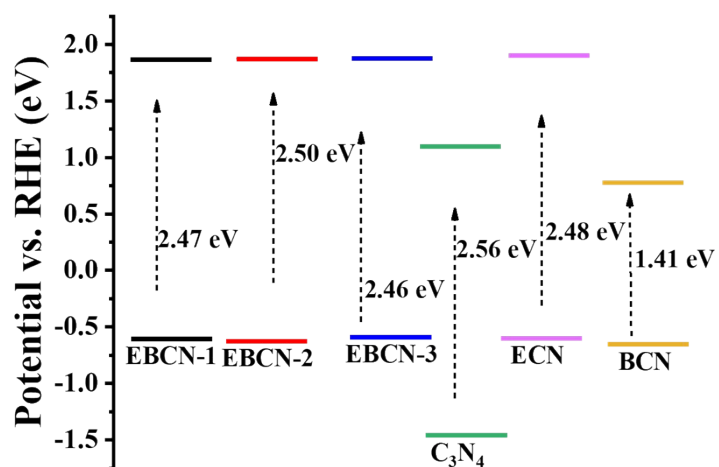

**Fig. S14.** Schematic diagram of the electronic band structure of fabricated samples.

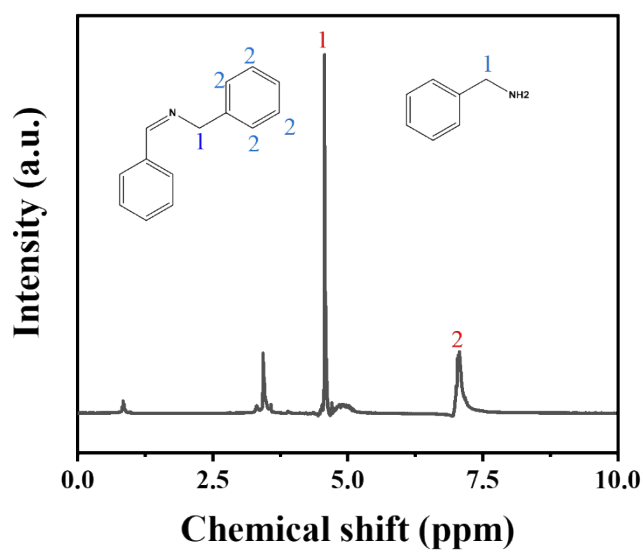

**Fig. S15.** <sup>1</sup>H NMR spectrum of benzylamine oxidation products.

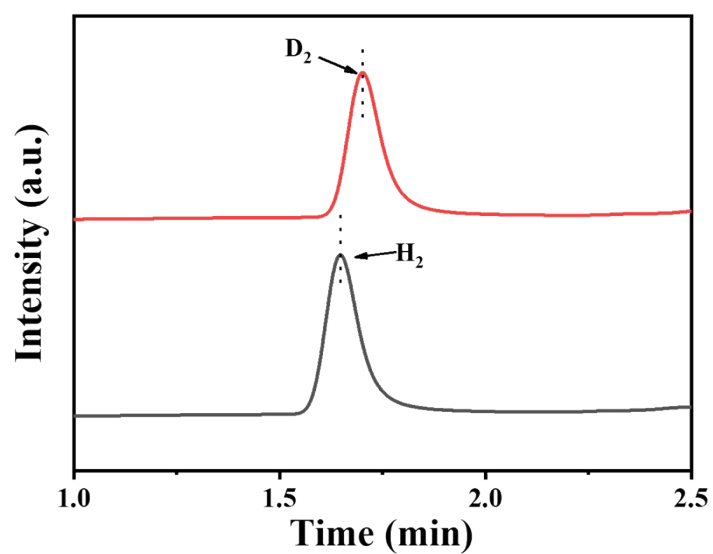

**Fig. S16.** The  $D_2O$  hydrogen production experiment of EBCN-2.

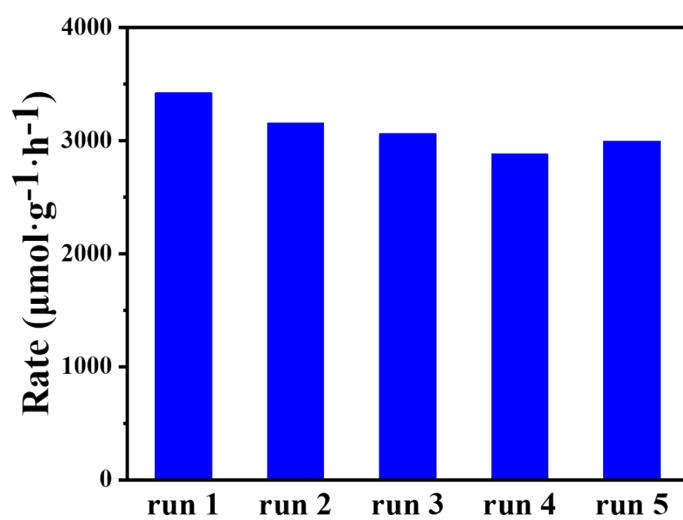

**Fig. S17.** Cycling performance of EBCN-2 toward selective benzylamine oxidation.

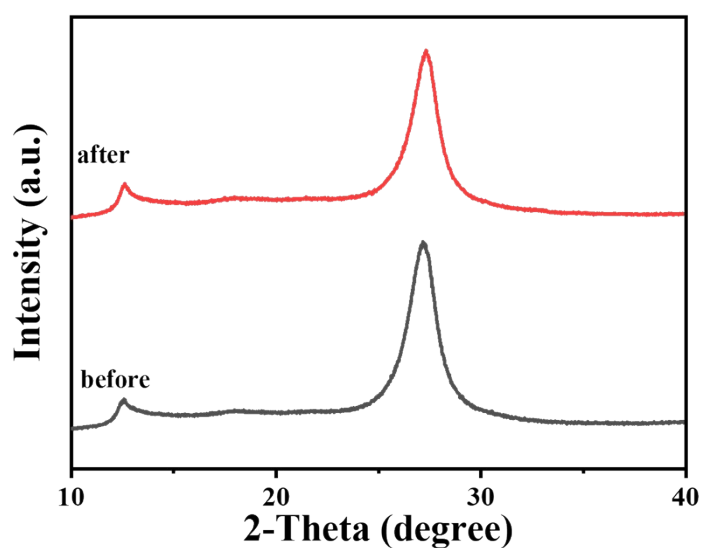

**Fig. S18.** XRD pattern of EBCN-2 before and after five cycles for photocatalytic H<sub>2</sub> production with selective benzylamine oxidation.

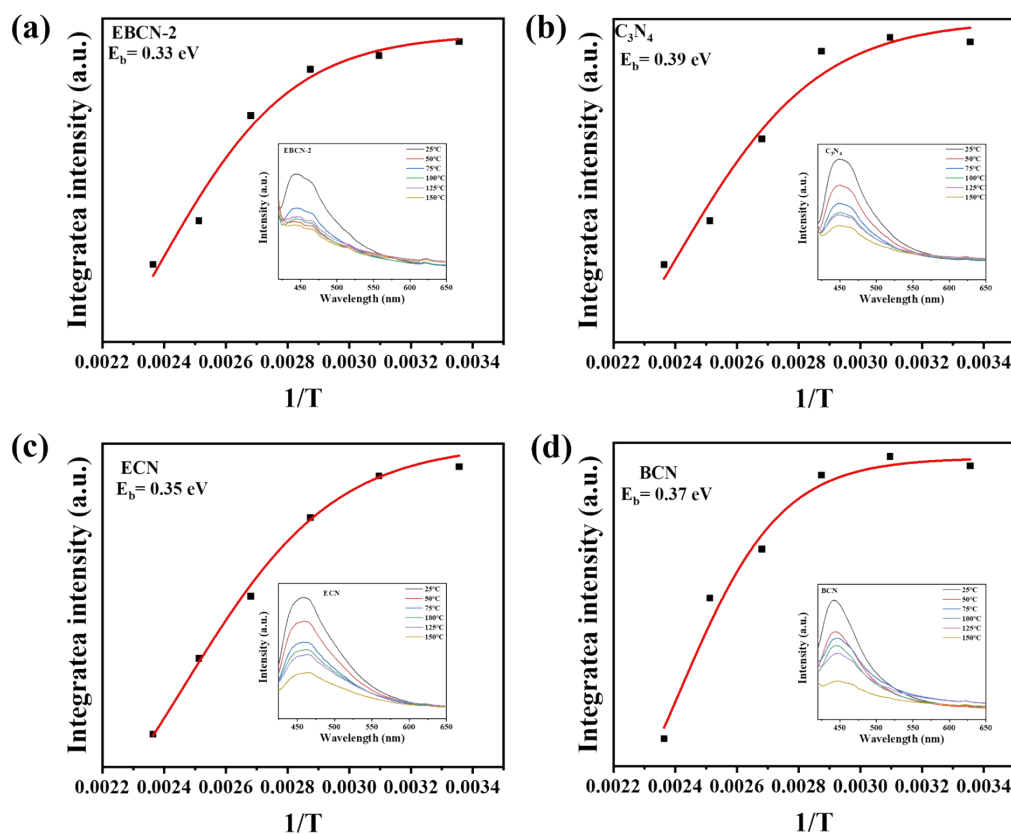

**Fig. S19.** Integrated PL emission intensity as a function of temperature from 298 to 423

K of (a) EBCN-2, (b) C<sub>3</sub>N<sub>4</sub>, (c) ECN and (d) BCN

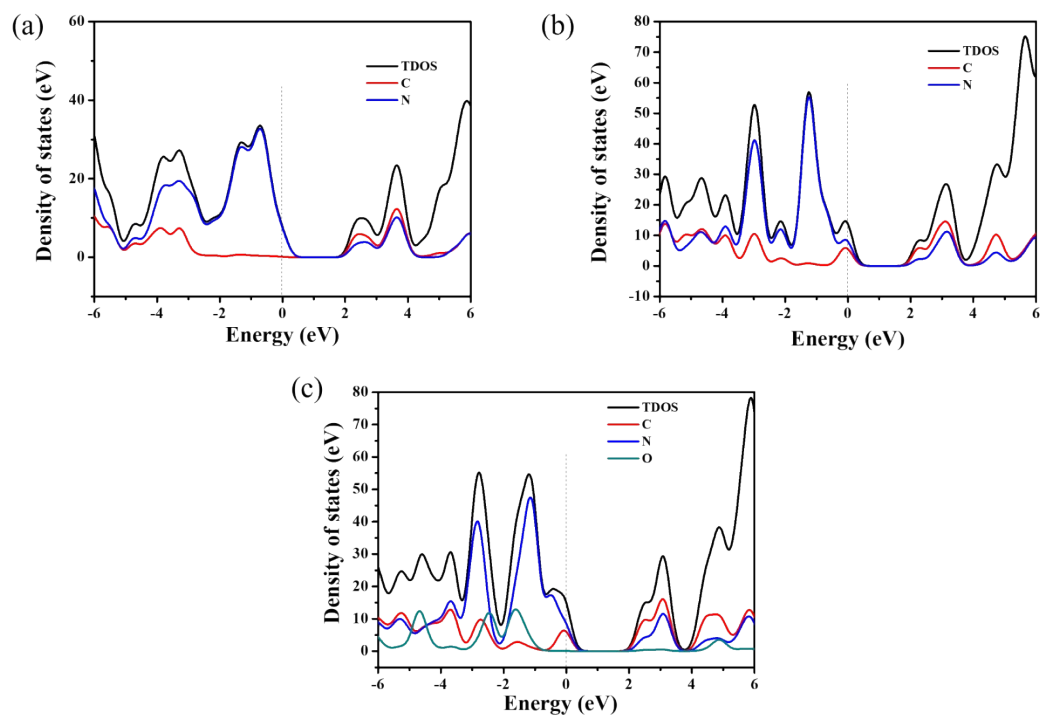

**Fig. S20.** the DOS of (a)  $C_3N_4$ , (b) ECN and (c) BCN.

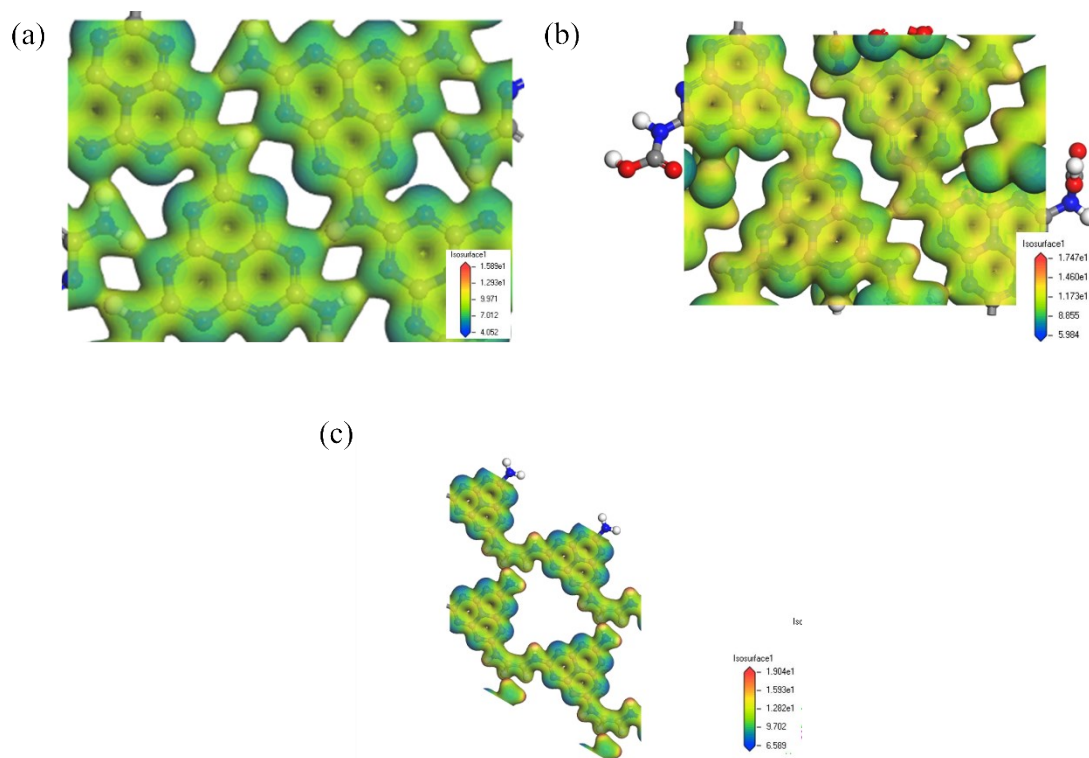

**Fig. S21.** The charge density of (a)  $C_3N_4$ , (b) ECN and (c) BCN.

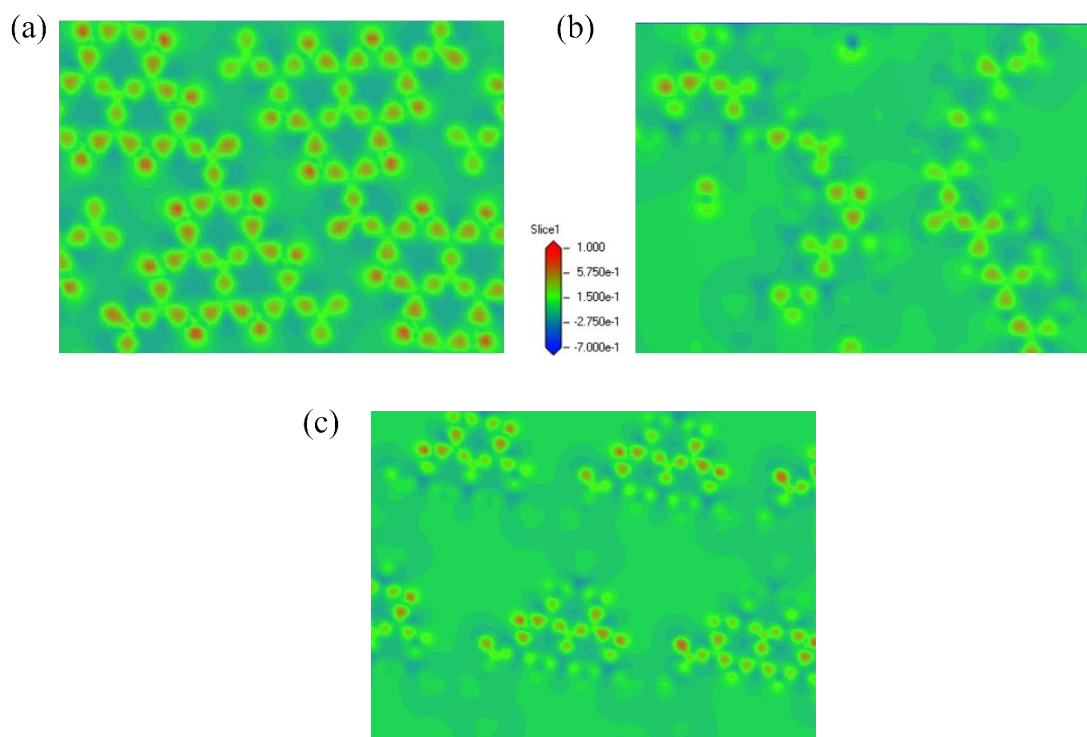

**Fig. S22.** The differential charge density of (a)  $C_3N_4$ , (b) ECN and (c) BCN.

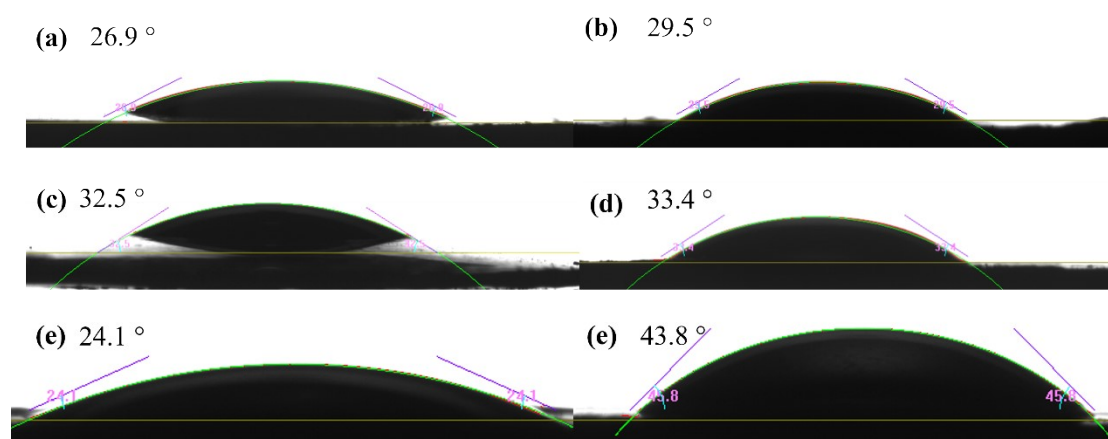

**Fig. S23.** Contact-angle of water on the surface of (a) EBCN-1, (b) EBCN-2, (c) EBCN-3, (d)  $C_3N_4$ , (e) ECN and (f) BCN.

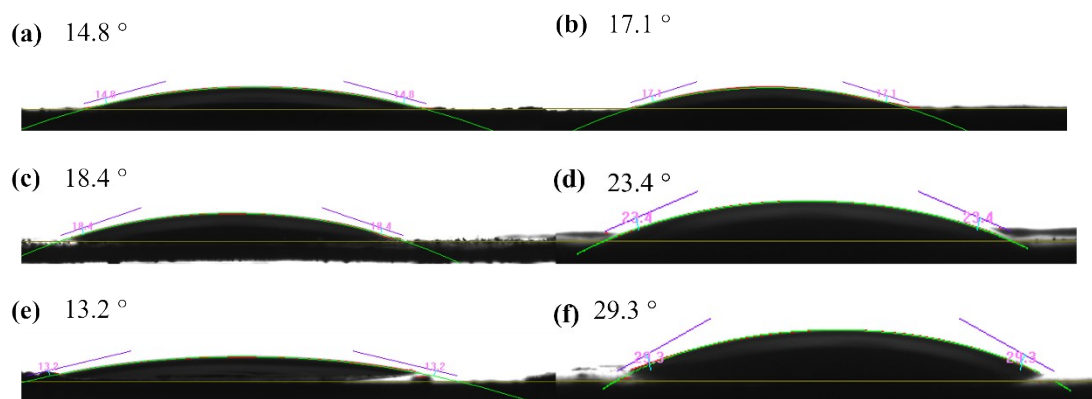

**Fig. S24.** Contact-angle of benzylamine on the surface of (a) EBCN-1, (b) EBCN-2, (c) EBCN-3, (d)  $C_3N_4$ , (e) ECN and (f) BCN.

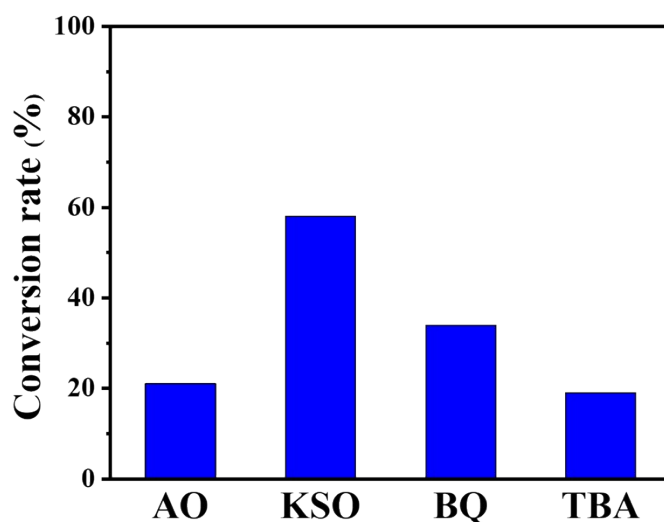

**Fig. S25.** Photocatalytic selective oxidation of benzylamine over EBCN-2 with or without a scavenger. Ammonium oxalate (AO), Potassium persulfate (KSO), p-benzoquinone (BQ) and tert-butanol (TBA) as scavengers for the hole ( $h^+$ ), electron ( $e^-$ ), superoxide radical ( $O_2^{\cdot-}$ ) and hydroxyl radical ( $\cdot OH$ ) trapping, respectively.

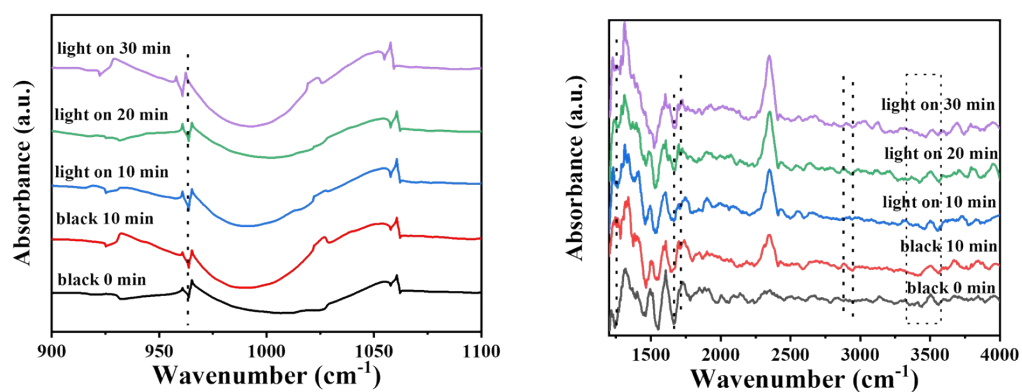

**Fig. S26.** *in situ* FT-IR of EBCN-2 under water and benzylamine.

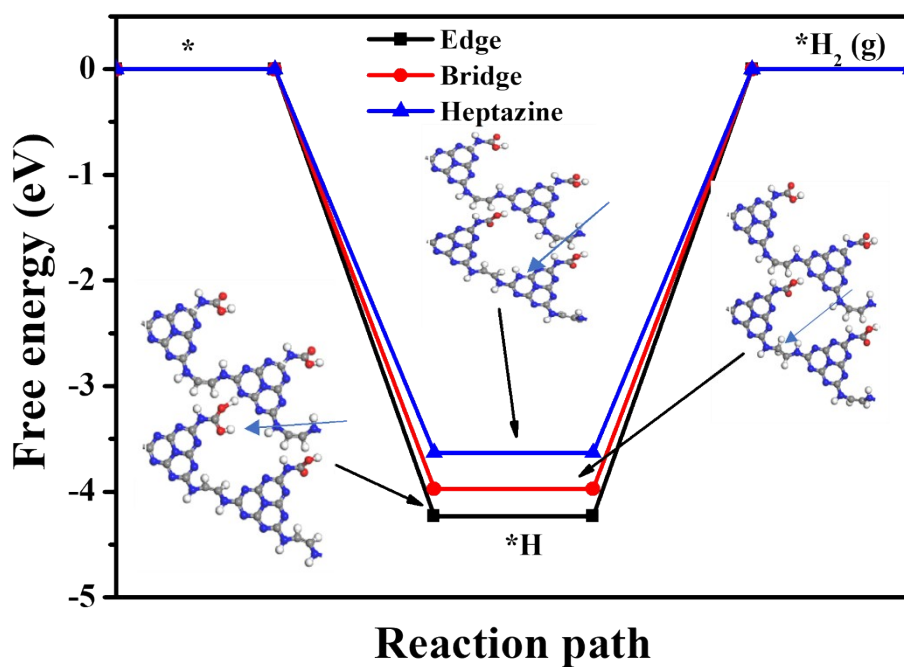

**Fig. S27.** DFT-calculated Gibbs free energy of hydrogen adsorption.

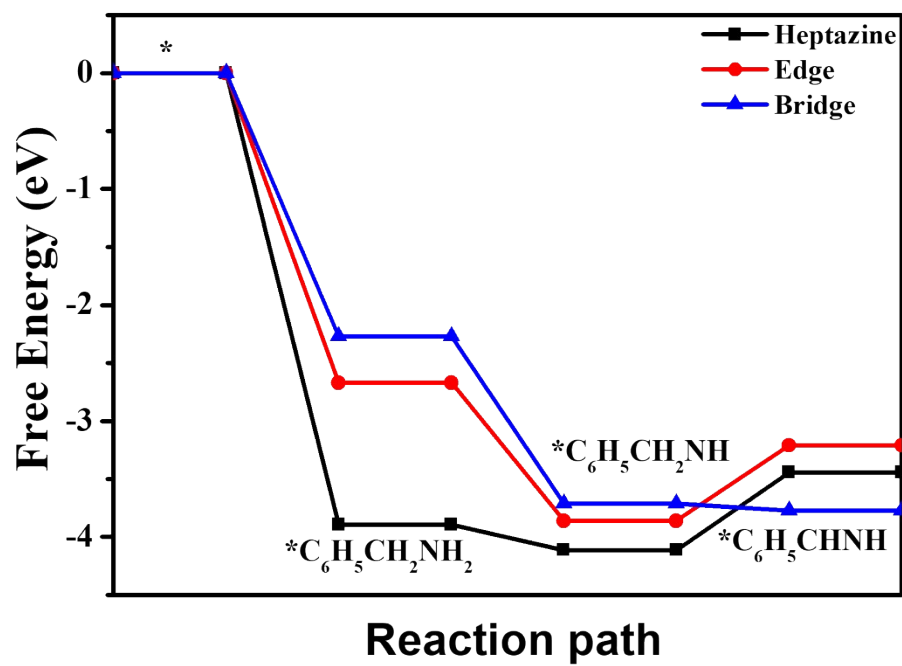

Fig. S28. DFT-calculated Gibbs free energy of selective amines oxidation.

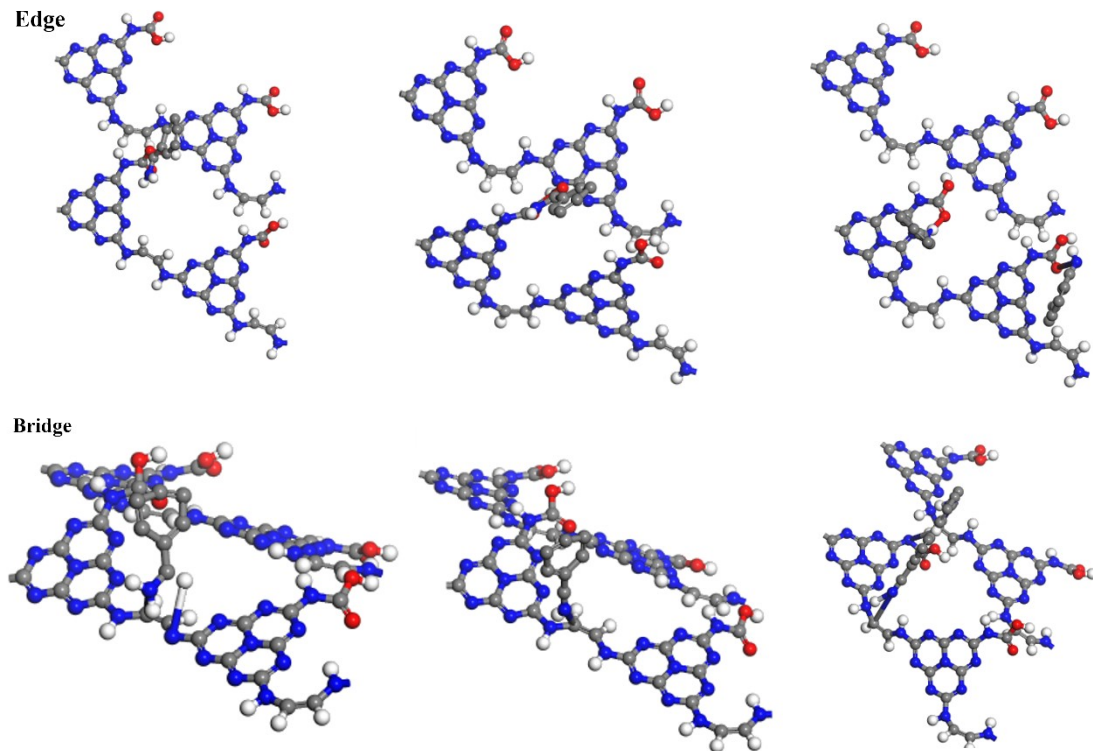

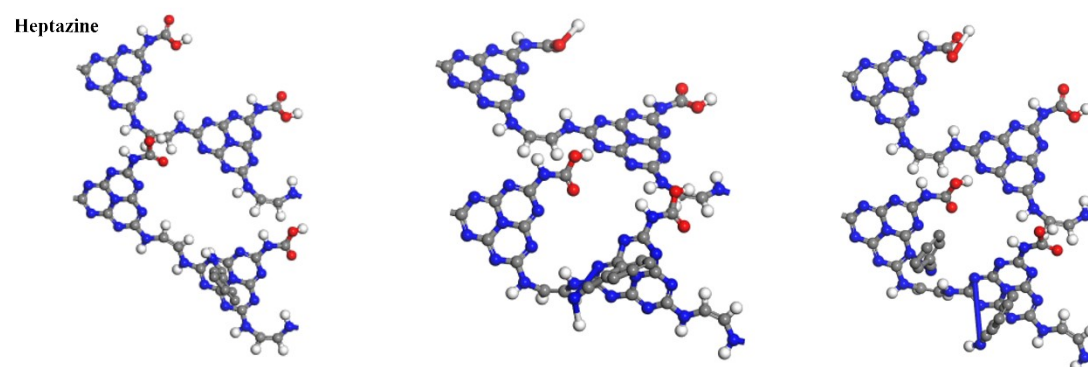

**Fig. S29.** The geometrical configuration for benzylamine dehydrogenation.

## Reference:

- S1 H. Liu, C. Xu, D. Li, H.-L. Jiang, *Angew. Chem. Int. Ed.*, 2018, **57**, 5379-5383.
- S2 T. Wang, X. Tao, X. Li, K. Zhang, S. Liu, B. Li, *Small.*, 2021, **17**, e2006255.
- S3 H. Wang, P. Hu, J. Zhou, M.B.J. Roefsaers, B. Weng, Y. Wang, H. Ji, *J. Mater. Chem. A*, 2021, **9**, 19984-19993.
- S4 V.W.-h. Lau, M.B. Mesch, V. Duppel, V. Blum, J. Senker, B.V. Lotsch, *J. Am. Chem. Soc.*, 2015, **137**, 1064-1072.
- S5 Y.A. Workie, Sabrina, T. Imae, M.P. Krafft, *ACS Biomater. Sci. Eng.*, 2019, **5**, 2926-2934.
- S6 G. Zhang, Y. Xu, C. He, P. Zhang, H. Mi, *Appl. Catal. B Environ.*, 2021, **283**, 119636.
- S7 S. Yang, Q. Wang, Q. Wang, G. Li, T. Zhao, P. Chen, F. Liu, S.-F. Yin, *J. Mater. Chem. A*, 2021, **9**, 21732-21740.
- S8 P. Kumar, E. Vahidzadeh, U.K. Thakur, P. Kar, K.M. Alam, A. Goswami, N. Mahdi, K. Cui, G.M. Bernard, V.K. Michaelis, K. Shankar, *J. Am. Chem. Soc.*, 2019, **141**, 5415-5436.
- S9 Z. Gao, K. Chen, L. Wang, B. Bai, H. Liu, Q. Wang, *Appl. Catal. B Environ.*, 2020, **268**, 118462.
- S10 W. Zhao, Y. Li, P. Zhao, L. Zhang, B. Dai, J. Xu, H. Huang, Y. He, D.Y.C. Leung, *Chem. Eng. J.*, 2021, **405**, 126555.
- S11 J. Meng, X. Wang, Y. Liu, M. Ren, X. Zhang, X. Ding, Y. Guo, Y. Yang, *Chem. Eng. J.*, 2021, **403**, 126354.
